# Supplementary figures and images for: Interaction between PAR-3 and the aPKC–PAR-6 complex is indispensable for apical domain development of epithelial cells
Source: Oxford University Press journal article supplement (doi:10.1242/jcs.043174), 2009-04-29

A

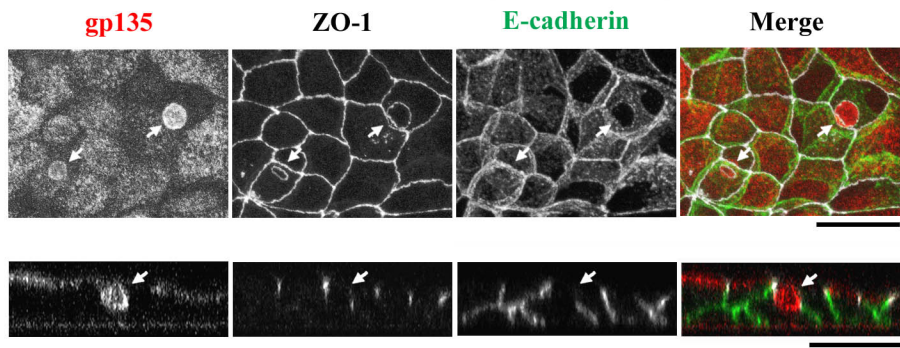

B

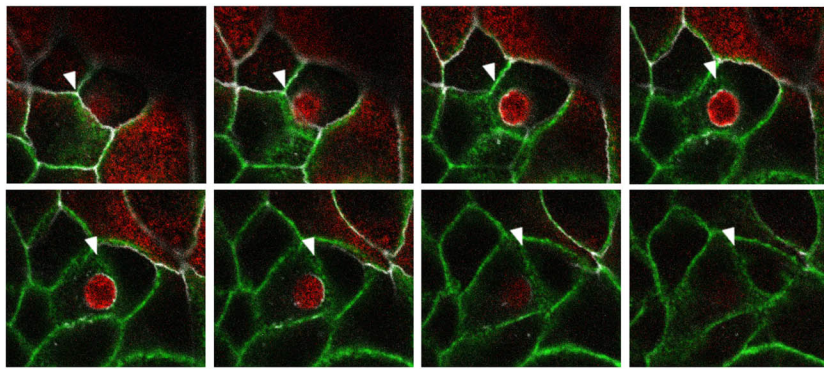

E-cadherin / gp135 / ZO-1

Supplement: jcs043174-sup-043174-figs1.pdf [file jcs043174-sup-043174-figs1.pdf]

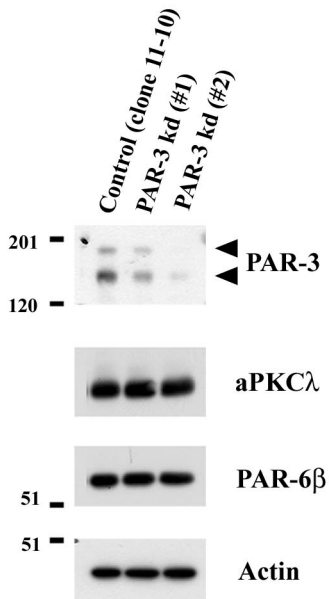

Supplement: jcs043174-sup-043174-figs2.pdf [file jcs043174-sup-043174-figs2.pdf]

A.

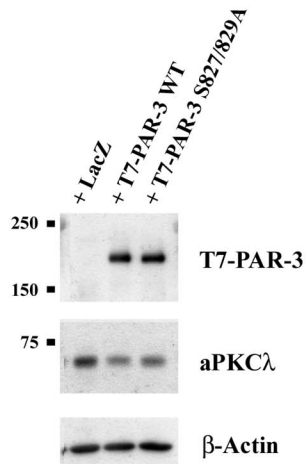

B.

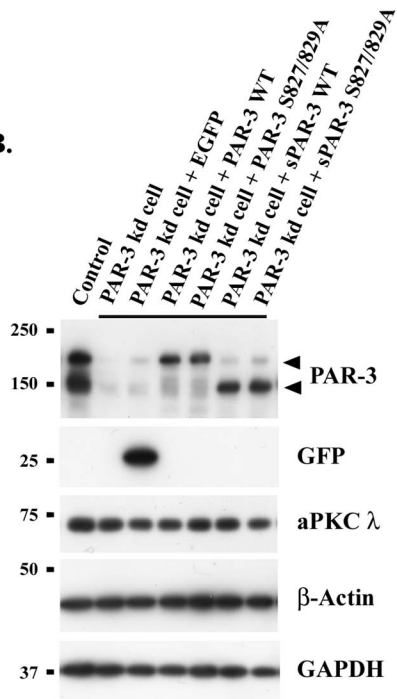

Supplement: jcs043174-sup-043174-figs3.pdf [file jcs043174-sup-043174-figs3.pdf]

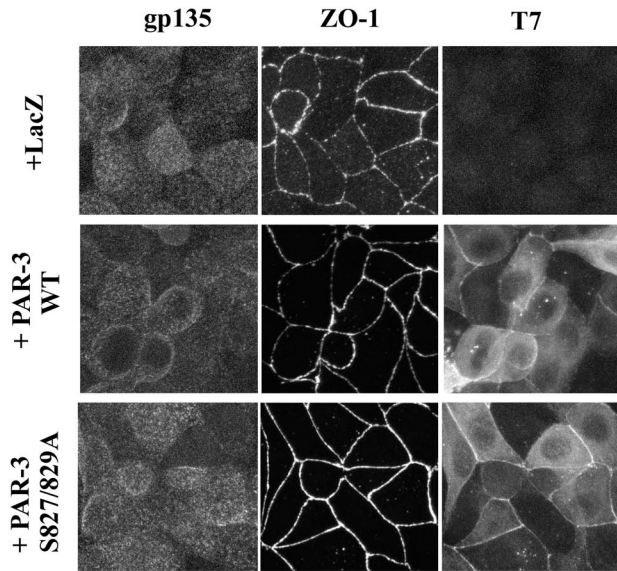

Supplement: jcs043174-sup-043174-figs4.pdf [file jcs043174-sup-043174-figs4.pdf]
